1

2

3

4       The turning and barrier course reveals gait parameters for detecting freezing of gait and  
5                                       measuring the efficacy of deep brain stimulation

6

7

8 Johanna O'Day<sup>1,2</sup>, Judy Syrkin-Nikolau<sup>2,#a</sup>, Chioma Anidi<sup>2,#b</sup>, Lukasz Kidzinski<sup>1</sup>,

9 Scott Delp<sup>1</sup>, Helen Bronte-Stewart<sup>2,3\*</sup>

10

11 <sup>1</sup> Department of Bioengineering, Stanford University, Stanford, California, United States of  
12 America

13 <sup>2</sup> Department of Neurology and Neurological Sciences, Stanford University, Stanford, California,  
14 United States of America

15 <sup>3</sup> Department of Neurosurgery, Stanford University, Stanford, California, United States of  
16 America

17 <sup>#a</sup> Current Address: Cala Health, Burlingame, California, United States of America

18 <sup>#b</sup> Current Address: University of Michigan Medical School, Ann Arbor, Michigan, United States  
19 of America

20

21 \* Corresponding author

22 E-mail: [hbs@stanford.edu](mailto:hbs@stanford.edu) (HBS)

## 23 **Abstract**

24           Freezing of gait (FOG) is a devastating motor symptom of Parkinson's disease that leads  
25 to falls, reduced mobility, and decreased quality of life. Reliably eliciting FOG has been difficult  
26 in the clinical setting, which has limited discovery of pathophysiology and/or documentation of  
27 the efficacy of treatments, such as different frequencies of subthalamic deep brain stimulation  
28 (STN DBS). In this study we validated an instrumented gait task, the turning and barrier course  
29 (TBC), with the international standard FOG questionnaire question 3 (FOG-Q3,  $r = 0.74$ ,  $p <$   
30  $0.001$ ). The TBC is easily assembled and mimics real-life environments that elicit FOG. People  
31 with Parkinson's disease who experience FOG (freezers) spent more time freezing during the  
32 TBC compared to during forward walking ( $p = 0.007$ ). Freezers also exhibited greater  
33 arrhythmicity during non-freezing gait when performing the TBC compared to forward walking  
34 ( $p = 0.006$ ); this difference in gait arrhythmicity between tasks was not detected in non-freezers  
35 or controls. Freezers' non-freezing gait was more arrhythmic than that of non-freezers or controls  
36 during all walking tasks ( $p < 0.05$ ). A logistic regression model determined that a combination of  
37 gait arrhythmicity, stride time, shank angular range, and asymmetry had the greatest probability  
38 of classifying a step as FOG (area under receiver operating characteristic curve = 0.754).  
39 Freezers' percent time freezing and non-freezing gait arrhythmicity decreased, and their shank  
40 angular velocity increased in the TBC during both 60 Hz and 140 Hz STN DBS ( $p < 0.05$ ) to  
41 non-freezer values. The TBC is a standardized tool for eliciting FOG and demonstrating the  
42 efficacy of 60 Hz and 140 Hz STN DBS for gait impairment and FOG. The TBC revealed gait  
43 parameters that differentiated freezers from non-freezers and best predicted FOG; these may  
44 serve as relevant control variables for closed loop neurostimulation for FOG in Parkinson's  
45 disease.

46

## 47 **Introduction**

48 Gait impairment and freezing of gait (FOG) are common in Parkinson's disease, and lead to  
49 falls, [1–3] resulting in injury, loss of independence, institutionalization, and even death [4,5].  
50 Over 10 million people are affected by Parkinson's disease (PD) worldwide, and over 80% of  
51 people with moderate to advanced PD develop FOG [6]. Gait impairment is characterized by the  
52 loss of rhythmic alternating cycles of forward motion of one leg during the stance phase of the  
53 other leg, which are represented by the variability of stride time (rhythmicity) and the angular  
54 velocity of the lower leg (shank angular velocity) during the swing phase, respectfully. FOG is  
55 an intermittent, involuntary inability to perform alternating stepping and usually occurs when  
56 patients attempt to initiate walking, turn, or navigate obstacles.

57         Understanding and treating gait impairment and FOG are paramount unmet needs and  
58 were given the highest priority at the National Institute of Neurological Disorders and Stroke  
59 2014 PD conference [7]. Both gait impairment and FOG have unpredictable responses to  
60 dopaminergic medication and continuous high frequency open loop subthalamic deep brain  
61 stimulation (DBS) [8,9]. Although gait impairment and FOG may improve on continuous lower  
62 frequency (60 Hz) DBS, Parkinsonian tremor may worsen, and many patients do not tolerate 60  
63 Hz DBS for long periods of time [10–12]. A closed loop, adaptive system that can adjust  
64 stimulation appropriately may be able to improve therapy for FOG and impaired gait. Before this  
65 goal can be attained, however, it is important to determine which gait parameters are associated  
66 with freezing behavior, which predict freezing events, and the effect of different DBS  
67 frequencies on gait impairment and FOG.

68           Several studies have employed wearable inertial sensors to monitor, detect, and predict  
69 FOG using a variety of different gait parameters. The most popular approach has been to use a  
70 frequency-based analysis of leg accelerations to capture the “trembling of knees” associated with  
71 FOG, and many variations on this approach have been described including the “freeze index”  
72 [13] and “Frequency Ratio” [14]. These studies have employed a variety of different FOG-  
73 eliciting tasks, such as turning 360 degrees in place for two minutes, walking around cones, or  
74 walking during dual tasking [14–22]. These tasks have improved the detection of FOG but are  
75 not representative of real-world environments, or cannot objectively measure gait arrhythmicity,  
76 which has been correlated with FOG [23–27]. Objective gait measures and standardized gait  
77 tasks that reliably induce FOG are needed to study the progression of gait impairment and FOG  
78 in PD, and the efficacy of therapeutic interventions.

79           The goals of this study were to (1) validate a standardized gait task, the turning and  
80 barrier course (TBC), which mimics real-life environments and elicits FOG, (2) discover relevant  
81 gait parameters for detecting FOG in Parkinson’s disease in the TBC, and (3) evaluate the effects  
82 of 60 Hz and 140 Hz subthalamic deep brain stimulation (DBS) on quantitative measures of non-  
83 freezing gait and FOG.

84

## 85 **Materials and methods**

### 86 **Human subjects**

87 Twenty-three subjects with PD (8 female), and 12 age-matched healthy controls (11 female),  
88 participated in the study. Subjects were recruited from the Stanford Movement Disorders Center  
89 and were not pre-selected based on a history of FOG. Subjects were excluded if they had  
90 peripheral neuropathy, hip or knee prostheses, structural brain disorders, or any visual or

91 anatomical abnormalities that affected their walking. For all PD subjects, long-acting  
92 dopaminergic medication was withdrawn over 24h (72h for extended-release dopamine  
93 agonists), and short-acting medication was withdrawn over 12h before all study visits. A  
94 certified rater performed the Unified Parkinson's Disease Rating Scale (UPDRS III) motor  
95 disability scale [28], and the Freezing of Gait Questionnaire (FOG-Q, [29]) on all subjects. Four  
96 subjects had FOG-Q scores taken from a prior research visit within the last 4 months. Subjects  
97 were classified as a freezer or non-freezer based on the FOG-Q question 3 (FOG-Q3): *Do you*  
98 *feel that your feet get glued to the floor while walking, turning or when trying to initiate*  
99 *walking?* The scores were as follows: 0 – never, 1 – about once a month, 2 – about once a week,  
100 3 – about once a day, 4 – whenever walking. A freezer was defined as a subject who reported a  
101 FOG-Q3  $\geq 2$  or if the subject exhibited a freezing event during the tasks. Control subjects were  
102 excluded if they reported neurological deficits or interfering pathology that affected their gait.  
103 All subjects gave their written informed consent to participate in the study, which was approved  
104 by the FDA and the Stanford Institutional Review Board.

105

## 106 **Experimental protocol**

107 All experiments were performed off therapy (medication and/or DBS). Subjects performed two  
108 gait tasks: Forward Walking (FW), which is a standard clinical test of Parkinson's gait, and the  
109 TBC, in a randomized order at their self-selected pace. Both tasks started with 20s of quiet  
110 standing. For the FW task, subjects walked in a straight line for 10m, turned around and returned,  
111 and repeated this for a total of 40 m. We only analyzed data from the straight walking parts of  
112 FW. The FW task was conducted in a hallway at least 1.7 m wide formed by a wall and room  
113 dividers (Bretford Mobile Screens, Pivot Interiors Inc., Pleasanton, CA). The room dividers were

114 1.98 m high and a maximum of 1.14 m wide. In the TBC, subjects walked around and through a  
115 narrow opening formed by room dividers [25], Fig 1A.

116

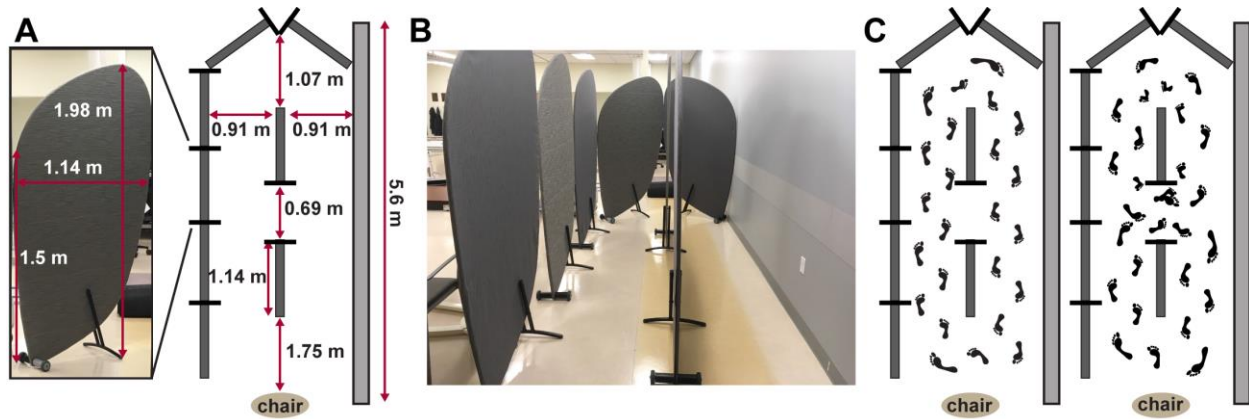

118 **Fig 1. Turning and Barrier Course (TBC) dimensions and specifications.** A: the individual  
119 barrier and course dimensions. Tall barriers limited vision around turns and narrow passageways  
120 to simulate a real-world environment. B: front view with patient walking in the TBC. C: aerial  
121 diagram of the TBC with barriers (dark grey bars) and wall (light grey bar). Subjects walked in  
122 two ellipses and then two figures of eight around the barriers; this task was repeated starting on  
123 both the left and right side, for a total of four ellipses and four figures of eight.

124

125 The TBC was enclosed by a row of dividers on one side and a wall on the other, Fig 1B, which  
126 limited the subjects' visual field; the aisles of the TBC were the same width as a standard  
127 minimum hallway (0.91 meters) in the U.S., and the narrow opening between dividers was the  
128 same width as a standard doorway (0.69 meters), Fig 1A. After the initial standing rest period,  
129 the subject was instructed to sit on the chair. At the 'Go' command, the subject was instructed to  
130 stand up, walk around the dividers twice in an ellipse, and then walk in a 'figure of eight' (i.e.,  
131 around and through the opening between the dividers), twice, before sitting down again, Fig 1C.

132 The subject was then instructed to repeat the task in the opposite direction, for a total of four  
133 ellipses and four figures of eight. The direction order was randomized.

134

## 135 Data acquisition and analysis

136 Shank angular velocity was measured during the gait tasks using wearable inertial measurement  
137 units (IMUs, APDM, Inc., Portland, OR), which were positioned in a standardized manner on the  
138 lateral aspect of both shanks. We aligned the IMU on the shank so that the positive Z-axis was  
139 directed laterally and measured the angular velocity of the shank in the sagittal plane. Signals  
140 from the IMUs' triaxial gyroscope and accelerometer and magnetometer were sampled at 128  
141 Hz. The data were filtered using a zero phase 8<sup>th</sup> order low pass Butterworth filter with a 9 Hz  
142 cut-off frequency, and principal component analysis was used to align the angular velocity with  
143 the sagittal plane. Using the sagittal plane angular velocity, the beginning of the swing phase  
144 (positive slope zero crossing), end of swing phase (subsequent negative slope zero crossing), and  
145 peak shank angular velocities (first positive peak following the beginning of swing phase) were  
146 identified, Fig 2.

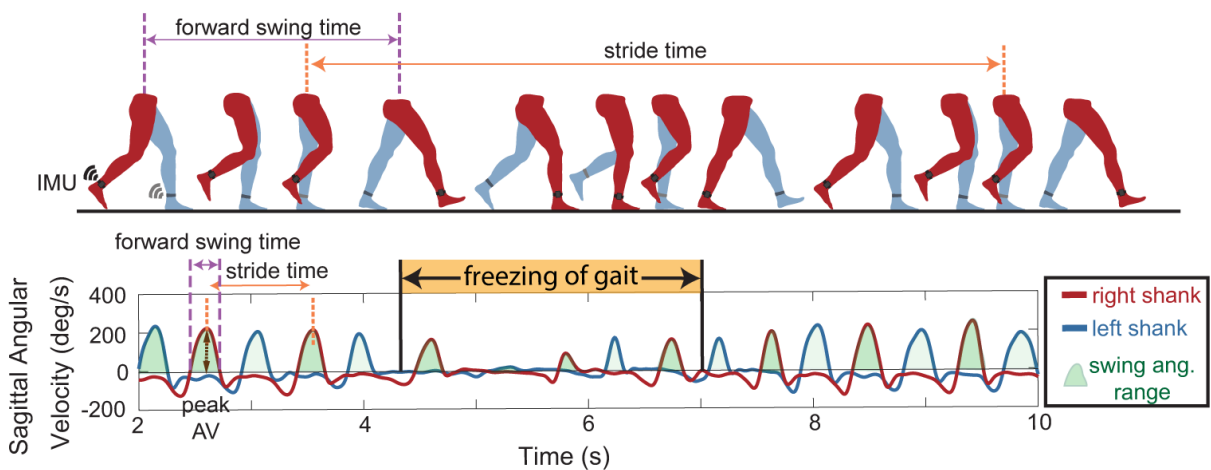

148 **Fig 2. Gait parameters extracted from inertial measurement units (IMU). Top:** schematic of  
149 one gait cycle with IMU on the shank used to define gait parameters including stride time,  
150 forward swing time, swing angular range and peak angular velocities (peak AV). **Bottom:** gait  
151 parameters extracted from shank sagittal angular velocity data for the left (blue) and right (red)  
152 legs during periods of non-freezing walking, and freezing of gait (orange).

153

154 Forward swing times (time between subsequent zero crossings of the same leg) and stride times  
155 (time between consecutive peak angular velocities) were calculated from these data, Fig 2. We  
156 used the peaks of the shank angular velocity trace (corresponding to forward swing of the leg) to  
157 calculate stride times for each leg to avoid difficulty of discerning heel strikes in PD [30]. These  
158 angular velocity peaks were readily identifiable with a computer algorithm and visually. Peaks  
159 were marked as steps only if they exceeded a minimum threshold of 10 deg/s, therefore freezing  
160 episodes occurred when there was no forward movement of leg or it was below this threshold.

161 Swing angular range was calculated by integrating the sagittal angular velocity curve during the  
162 swing time. Swing times and stride times were used to calculate asymmetry and arrhythmicity  
163 respectively, during periods when the subject was not freezing. Asymmetry was defined as:

164  $\text{asymmetry} = 100 \times |\ln(\text{SSWT}/\text{LSWT})|$ , where SSWT and LSWT correspond to the leg with the  
165 shortest and longest mean swing time over the trials, respectively and arrhythmicity was defined

166 as:  $\text{arrhythmicity} = \text{the mean stride time coefficient of variation of both legs}$  [23,26,31]. A large

167 stride time coefficient of variation is indicative of a less rhythmic gait. We developed a “forward

168 freeze index” inspired by the “Freeze Index” [13], and used antero-posterior accelerations

169 instead of vertical accelerations, making it similar to the “Frequency Ratio” [14]. We used a

170 window of 2s rather than 4s because 2s was closer to the mean stride time, and therefore



171 consistent with our other stride-by-stride metrics. The forward freeze index was calculated as the  
172 square of the total power in the freeze band (3-8 Hz) over a 2s window, divided by the square of  
173 the total power in the locomotor band (0.5-3 Hz) over the same 2s window. External videos of all  
174 tasks were acquired on an encrypted clinical iPad (Apple Inc., Sunnyvale, CA) and synchronized  
175 with the APDM data capture system through the Videography application (Appologics Inc.,  
176 Germany).

177

## 178 **A logistic regression model of freezing of gait**

179 We developed a logistic regression model to calculate the probability that a given stride was part  
180 of a freezing episode. The model was trained using 8 gait parameters (peak shank angular  
181 velocity, stride time, swing angular range, arrhythmicity, asymmetry, forward freeze index, peak  
182 shank angular velocity of the previous step, stride time of the previous step) and ground truth  
183 binary labels (FOG = 1, no FOG = 0), from an experienced neurologist's (HBS) video-  
184 determined ratings of freezing behavior, defined as periods where patient's normal gait pattern  
185 changed (usually prior to a freezing episode) and where such behavior ended. VCode software  
186 (Hagedorn, Hailpern, & Karahalios, 2008), was used to mark periods of freezing behavior in  
187 each video with an accuracy of 10ms. Individual strides were identified using the shank angular  
188 velocity trace as described above, and gait parameters were extracted for each stride. The  
189 following gait parameters were calculated for each leg independently: peak shank angular  
190 velocity, stride time, swing time, and swing angular range. The stride time and peak shank  
191 angular velocity were normalized to averages from the subject's FW trial so that subjects could  
192 be combined and compared to one another in the model. A step is likely to be a freeze if the step  
193 before it has characteristics of a freeze, so the peak shank angular velocity for the previous stride

194 was included as a model input [15]. The swing and stride times for both legs were concatenated  
195 to calculate arrhythmicity and asymmetry over the past 6 strides.

196 Analysis of gait parameters was performed in MATLAB (version 9.2, The MathWorks  
197 Inc. Natick, MA, USA), and the logistic regression model was constructed using R (R Core  
198 Team (2017)). We used a logistic regression model with a sparse set of features determined by  
199 L1 regularization (LASSO) to predict whether a step was freezing or not. To evaluate model  
200 performance, we used leave-one-out cross validation (LOOCV), which we refer to as external  
201 LOOCV, where we left out a single subject as the test set. We then used the remaining subjects  
202 as a training set, and used internal LOOCV, leaving out another subject as an internal test set  
203 with which we used L1 regularization (LASSO) to determine a sparse set of features for the  
204 model. Regularization minimizes the coefficients of different gait parameters, and the severity to  
205 which it does this is determined by the regularization parameter. We found the best  
206 regularization parameter (0.01) from the internal training set. This was repeated so that all  
207 subjects were left out. We found that the variables selected by the internal LOOCV were  
208 consistent across all runs, giving the combination of variables that best identified FOG. In both  
209 LOOCVs, we kept subjects, who had multiple visits' worth of data together. For example, if  
210 Subject X had two different visits, then data from both visits were either in the training set *or* in  
211 the test set.

212

## 213 **Investigating effects of DBS frequency in a subset of the PD cohort**

214 A subset of the cohort, twelve PD subjects (7 freezers and 5 non-freezers), had been treated with  
215 at least 21 months of optimized, continuous high frequency subthalamic DBS using an  
216 implanted, investigative, concurrent sensing, and stimulating, neurostimulator (Activa® PC + S,

217 FDA-IDE approved; model 3389 leads, Medtronic, Inc.). Kinematic recordings were obtained,  
218 off medication, during randomized presentations of no, 60 Hz, and 140 Hz subthalamic DBS  
219 while subjects performed the TBC. The voltage was the same at both frequencies for each  
220 subject's subthalamic nucleus. At least five minutes was allotted between experiments to allow  
221 the subjects to rest.

222

## 223 **Statistics**

224 A two-way repeated-measures multivariate analysis of variance (MANOVA) test was conducted  
225 to assess the effect of Group (Control, Non-Freezer, Freezer) or Task (Forward Walking, TBC  
226 ellipse, TBC figure of eight), on average peak shank angular velocity, stride time, asymmetry,  
227 and arrhythmicity for the three groups during non-freezing walking while OFF DBS. If a main  
228 effect was found in the MANOVA, follow up univariate ANOVAs were used to evaluate  
229 significant parameters. Post-hoc pairwise effects were examined using a Bonferroni correction.

230 A three-way repeated measures ANOVA was used to compare the effect of DBS frequency  
231 (OFF, 60 Hz, 140 Hz), Group (Non-Freezer, Freezer), or Task (TBC ellipse, TBC figure of  
232 eight) during non-freezing walking in the TBC. Post hoc analyses were conducted to compare  
233 between stimulation conditions. A Student t-test was used to compare freezers' percent time  
234 spent freezing in the TBC ellipses versus TBC figures of eight. Students t-tests were used for the  
235 comparison of demographics between the freezer, non-freezer and control groups. A paired  
236 samples Wilcoxon test was used to compare UPDRS III scores between visits for subjects with  
237 repeated visits. The relationship between percent time freezing and FOG-Q3 response was  
238 investigated using a Spearman correlation analysis. The relationship between gait parameters and  
239 FOG-Q3 response was investigated using a Spearman correlation analysis. The relationship

240 between percent time freezing and average peak shank angular velocity, stride time, asymmetry,  
241 and arrhythmicity during non-freezing walking was investigated using a Pearson correlation  
242 analysis to compare freezers' non-freezing walking with the severity of their freezing behavior.  
243 All statistical testing was performed in SPSS Version 21, or SigmaPlot (Systat Software, San  
244 Jose, CA) using two-tailed tests with significance levels of  $p < .05$ .

245

## 246 **Results**

### 247 **Human subjects**

248 Among the 23 PD subjects, there were 8 freezers, 13 non-freezers, and 2 subjects who converted  
249 from the definition of a non-freezer to a freezer between two visits. Non-freezers and controls  
250 were of similar ages, while freezers were younger ( $65.9 \pm 7.5$ ,  $66.9 \pm 8.9$  years,  $57.9 \pm 6.14$ ,  
251 respectively,  $p < 0.05$ ). Disease duration was similar between the freezer and non-freezer groups  
252 ( $9.3 \pm 2.8$ ,  $8.9 \pm 4.2$  years, respectively). Freezers had a higher off medication UPDRS III score  
253 than non-freezers ( $39.8 \pm 9.2$ ,  $24.1 \pm 13.6$  respectively,  $p < 0.01$ ), and all PD patients had higher  
254 UPDRS III scores than controls ( $p < 0.001$ ). All subjects completed all walking tasks, except two  
255 freezers who could not complete the TBC, and one non-freezer whose sensor data was unusable;  
256 these three subjects were excluded from the analysis. Three healthy control subjects were  
257 excluded due to arthritis (N=2) or essential tremor (N=1), which affected their walking. The  
258 average total durations of FW and the TBC were  $33.1 \pm 8.7$  and  $157.4 \pm 88.9$  seconds,  
259 respectively.

260         Nine subjects had repeat visits. The length between repeated visits was  $430 \pm 112$  days  
261 (mean  $\pm$  SD) and the repeated visit group's mean UPDRS III score trended higher but was not

262 significant at the second visit ( $32.4 \pm 12.0$ ,  $35.7 \pm 14.8$ , respectively,  $p = 0.09$ ). The repeated  
263 patient visits were treated independently. Data from 40 visits (9 from controls, 13 from freezers,  
264 and 18 from non-freezers) were used to examine how the three different cohorts completed the  
265 gait tasks while OFF stimulation. In assessing the effects of lower and high frequency  
266 subthalamic DBS on subjects in the TBC, there were no repeat visits.

267

### 268 **Gait parameters and percent time freezing in the TBC correlated** 269 **with the FOG-Q3**

270 Subjects' gait arrhythmicity and shank angular velocity during non-freezing gait of the FW task,  
271 TBC ellipses and TBC figures of eight were strongly correlated with their self-reported freezing  
272 severity (FOG-Q3 score;  $r = 0.65$ ,  $0.46$ ,  $0.73$  for arrhythmicity respectively, and  $r = -0.58$ ,  $-0.46$ ,  
273  $-0.65$  for shank angular velocity respectively,  $p < 0.003$  for all), Fig 3. The correlation was  
274 strongest during the TBC figures of eight for both gait parameters.

275

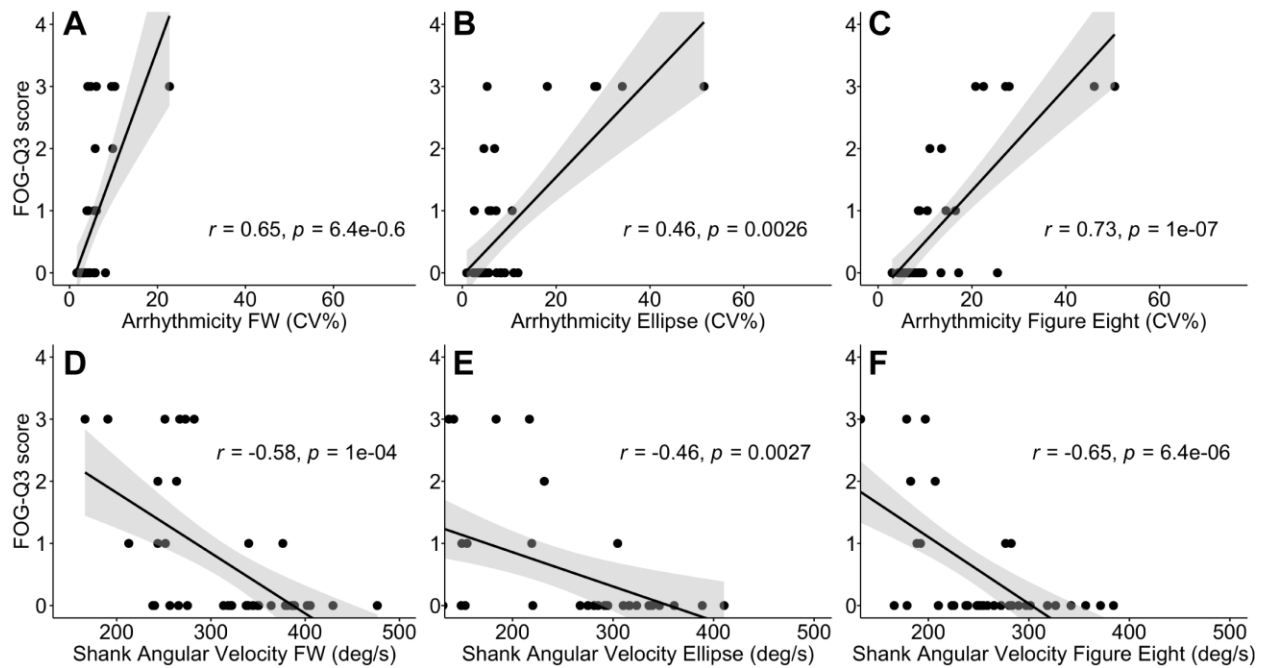

276

277 **Fig 3. Relationship between gait parameters and freezing of gait questionnaire question 3**  
278 **(FOG-Q3) during walking tasks.** Correlation with FOG-Q3 between **A – C:** gait arrhythmicity,  
279 and **D – F:** shank angular velocity, during FW (**A, D**), TBC ellipses (**B, E**), and TBC figures of  
280 eight (**C, F**). Regression lines (black line) and confidence intervals of the correlation coefficient  
281 at 95% (shaded grey), and subjects (black dots) shown.

282

283 Gait asymmetry was also modestly correlated with FOG-Q3 score in the FW task, the TBC  
284 ellipses and the TBC figures of eight ( $r = 0.44, 0.46, 0.42$  respectively,  $p < 0.01$  for all). Stride  
285 time was not correlated with FOG-Q3 in any of the walking tasks ( $p > 0.05$  for all).

286

287 During the TBC, all freezers experienced a freezing episode. In total, 217 freezing  
288 episodes were identified. Freezers spent more time freezing in the TBC figures of eight than the  
289 TBC ellipses ( $38.23 \pm 29.0 \%$ ,  $23.60 \pm 19.3 \%$ , respectively,  $p < 0.01$ ). During FW only one  
289 freezer experienced a freezing episode. Freezers spent an average of  $33.0 \pm 24.2 \%$  of the time  
290 freezing in the TBC compared to the one freezer who spent 2% of the time freezing during

291 forward walking and was a moderate to severe freezer who spent 59% of the TBC task freezing  
292 (as determined by the blinded neurologist). There was a strong correlation between the time  
293 spent freezing in the TBC and a subject's report of freezing severity from the FOG-Q3 ( $r = 0.74$ ,  
294  $p < 0.001$ ), which validates the TBC as a tool for measuring FOG in Parkinson's disease. There  
295 was no significant correlation between the time spent freezing during FW and a subject's report  
296 of freezing severity from the FOG-Q3 ( $r = 0.28$ ,  $p = 0.075$ ). These results validate the TBC as a  
297 task that can measure gait impairment and FOG; the TBC figures of eight resulted in the  
298 strongest correlations between the FOG-Q3 and gait arrhythmicity, shank angular velocity and  
299 percent time freezing compared to the TBC ellipses or FW.

300

## 301 **Arrhythmicity during non-freezing gait differentiates freezers from** 302 **non-freezers**

303 Gait arrhythmicity during non-freezing walking differentiated freezers from non-freezers and  
304 from healthy controls in all gait tasks, Fig 4. MANOVA results indicated a main effect of Group  
305 (freezer, non-freezer, control,  $p < 0.001$ ) and Task (FW, TBC ellipse, TBC figures of eight,  $p <$   
306  $0.001$ ), demonstrating that the three groups were distinguishable regardless of task, and the tasks  
307 were distinguishable regardless of group. All four of the gait parameters showed significant  
308 univariate effects of Group, and all gait parameters except asymmetry showed significant  
309 univariate effects of Task. There was an interaction effect of Task\*Group ( $p = 0.011$ ), with a  
310 univariate effect only in arrhythmicity. Post-hoc pairwise comparisons showed that freezers'  
311 non-freezing gait was more arrhythmic than that of non-freezers or controls during all tasks ( $p <$   
312  $0.05$  for all), Fig 4A.

313

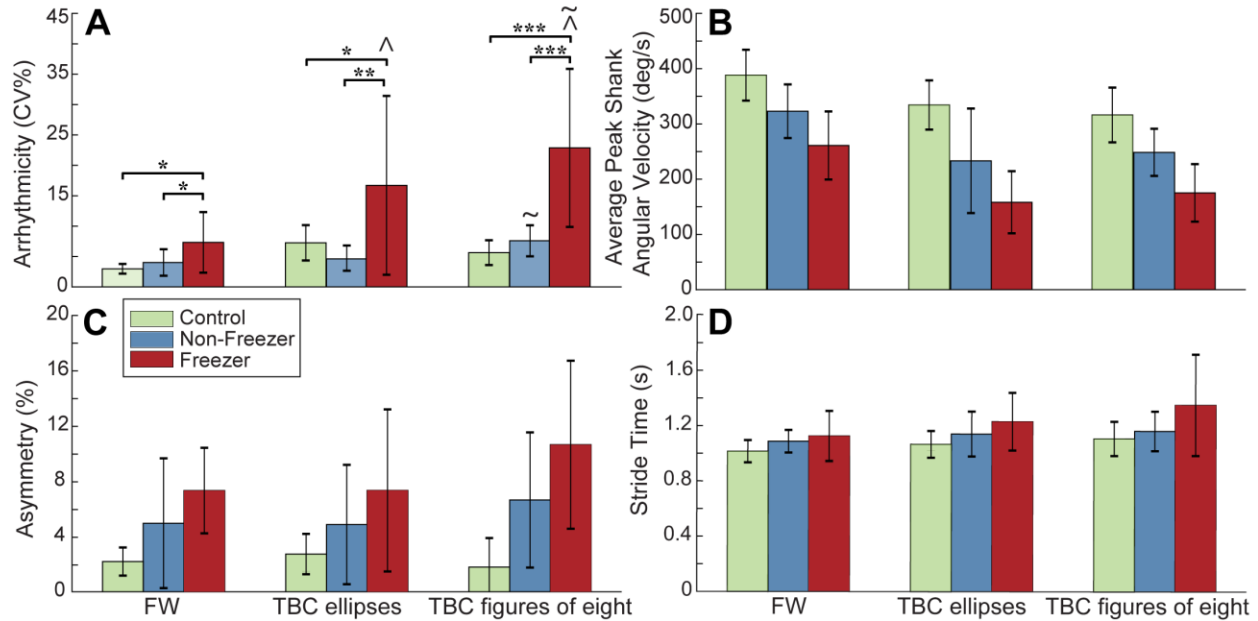

314

315 **Fig 4. Group gait parameters during walking tasks. A:** Gait arrhythmicity, **B:** average peak

316 shank angular velocity, **C:** asymmetry, and **D:** stride time in healthy controls, non-freezers and

317 freezers, during non-freezing FW, TBC ellipses and TBC figures of eight. Error bars represent

318 standard deviation. \*  $p < 0.05$ ; \*\*  $p < 0.01$ ; \*\*\*  $p < 0.001$ ; ^  $p < 0.05$  TBC ellipses and TBC

319 figures of eight compared to FW in freezers; ~  $p < 0.05$  between TBC ellipses and TBC figures

320 of eight in non-freezers and in freezers.

321

322 Post-hoc pairwise comparisons showed that freezers' non-freezing gait during both the TBC

323 ellipses and TBC figures of eight demonstrated greater arrhythmicity compared to their non-

324 freezing gait during FW ( $p = 0.001$ ,  $p < 0.001$ , respectively), and the arrhythmicity of both

325 freezers and non-freezers was greater in the TBC figures of eight than in the TBC ellipses ( $p <$

326  $0.001$ ,  $p = 0.02$  respectively), Fig 4A. No pairwise effect was detected for non-freezers' or

327 controls' gait arrhythmicity between TBC and FW. There was no Task\*Group interaction



328 observed for shank angular velocity, stride time or asymmetry, though the observed power for  
 329 these variables was low.

330

331 **Gait features in logistic regression model detect freezing on a step-**  
 332 **by-step basis**

333 A logistic regression model demonstrated that the best predictor of whether a stride was part of a  
 334 freezing episode used a combination of four gait parameters: swing angular range, stride time,  
 335 arrhythmicity, and asymmetry, and had an AUC of 0.754, Fig 5A.

336

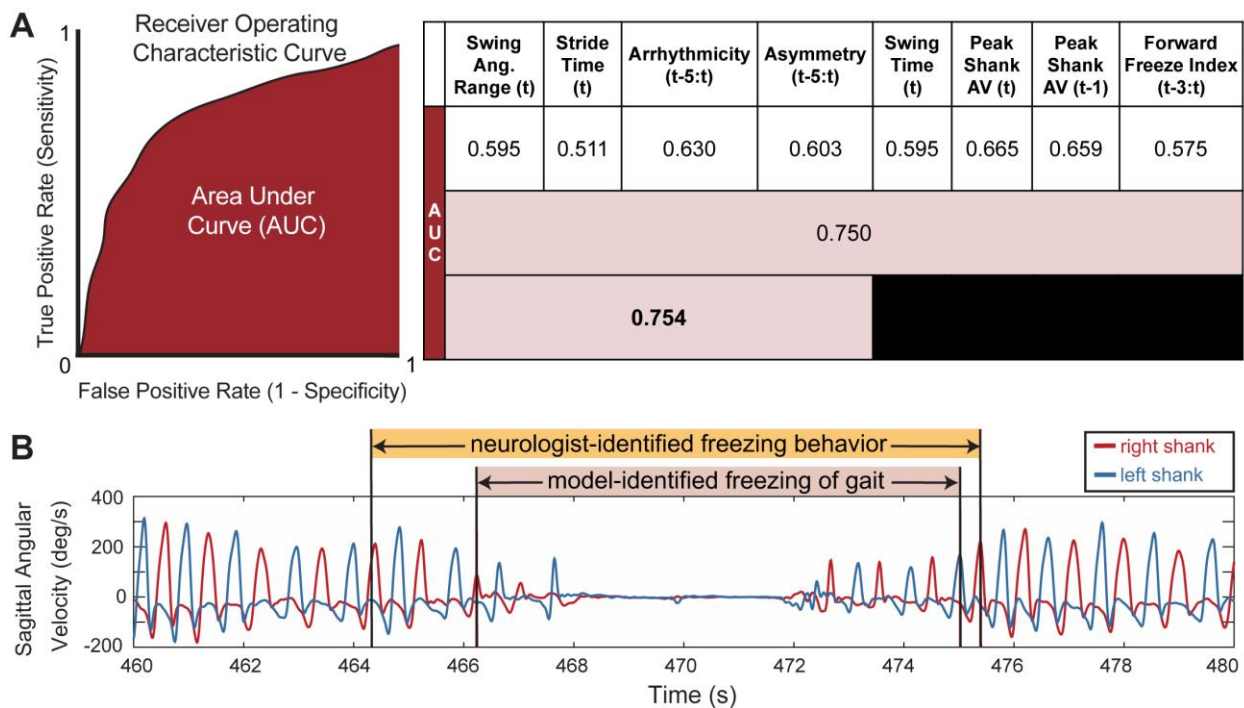

337

338 **Fig 5. Logistic regression model performance for different gait parameters. A:** overall

339 model performance: AUC values for different model iterations using leave-one-out cross

340 validation on the freezer group. First row: individual gait parameters; second row: all gait

341 parameters; third row: sparse parameter set chosen from regularization. Peak Shank AV = Peak

342 Shank Angular Velocity. Some metrics are calculated over a window of steps in time: “t-3:t”  
343 represents a window from “t-3” or 3 steps earlier, to and including the current step “t”. **B**:  
344 representative shank angular velocity traces from right and left legs; model-identified freezing  
345 events (pink shading) and neurologist-identified freezing behavior (orange shading).  
346  
347 Of these, the gait parameter with the largest coefficient and thereby the strongest predictor of  
348 whether a step was part of a freeze, was the arrhythmicity over the last six steps (coefficient of  
349 2.034), followed by stride time (coefficient of 0.0931), swing angular range (coefficient of -  
350 0.0615), and finally asymmetry over the last six steps (coefficient of 0.0003), with a model  
351 intercept of 0.941. The logistic regression models with single parameters had all coefficients  
352 significantly different from zero ( $p < 0.001$ ) but most were only moderately better than chance  
353 (AUC = 0.5), first row Fig 5A. A logistic regression model using all gait parameters, second row  
354 in Fig 5A, outperformed any single-parameter model but had an AUC (0.750) less than that of  
355 the four-parameter-model.  
356 Since the AUC is a threshold-independent assessment of the model, we calculated the accuracy  
357 of the model at a threshold of 0.50 (e.g. if the probability that the step was a freeze was over 50%  
358 then it was determined to be a freeze). At this threshold, the accuracy of the model to correctly  
359 identify a step as freezing or not freezing ((true positives + true negatives)/total number of steps),  
360 was 90%. We found that the model often detected a freezing event within the interval defined as  
361 freezing behavior by the neurologist, Fig 5B. In this case, the model overlapped with the  
362 neurologist-identified freezing behavior, though it did not detect some of preceding or  
363 succeeding freezing behavior identified by the neurologist. We defined such a case as correct  
364 model-identification of a freezing event, and overall, the model correctly identified 77% of the

365 neurologist-identified freezing behavior events, overlapping with neurologist markings within a  
366 2-stride window.

367 The time spent freezing in the TBC for all subjects, identified by the logistic regression  
368 model, correlated with the subject's score on FOG-Q3 ( $r = 0.68$ ,  $p < 0.001$ ). The percent time  
369 freezing predicted by the model for the control subjects and non-freezers was less than 1% for  
370 each subject, except for one subject who had one step erroneously classified as freezing resulting  
371 in 2.5% time spent freezing in the TBC.

372

### 373 **Percent time spent freezing correlated with freezers' gait**

#### 374 **parameters during non-freezing gait in the TBC**

375 Freezers' gait arrhythmicity during non-freezing gait in both the TBC ellipses and the TBC  
376 figures of eight were strongly correlated with their percent time freezing, as determined by the  
377 model ( $r = 0.94$ ,  $r = 0.92$  respectively,  $p < 0.001$  for both), Fig 6. Gait arrhythmicity during FW  
378 was not correlated with percent time freezing, Fig 6A.

379

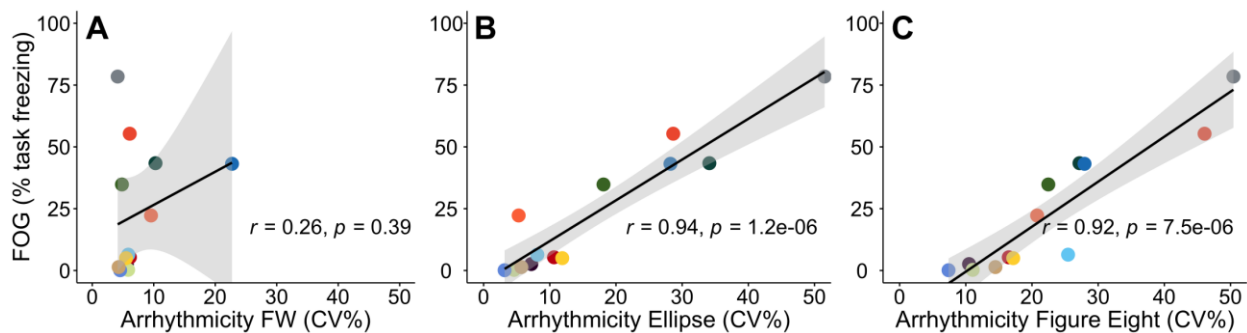

380

381 **Fig 6. Relationship between freezers' non-freezing gait arrhythmicity and freezing severity.**

382 Relationship between freezers' non-freezing gait arrhythmicity and percent time freezing **A:**

383 during FW, **B:** during the TBC ellipses, and **C:** during the TBC figures of eight. Regression lines

384 (black line) and confidence intervals of the correlation coefficient at 95% (shaded grey), and  
385 subjects (colored dots) shown.

386

387 Freezers' peak shank angular velocity during non-freezing gait in the TBC figures of eight, but  
388 not in the TBC ellipses or FW, also correlated with their percent time spent freezing in the TBC  
389 ( $r = -0.71$ ,  $p < 0.01$ , data not shown). There was no correlation between gait asymmetry or stride  
390 time during non-freezing walking in the TBC, or between any gait parameter during FW, with  
391 percent time freezing in the TBC. These results demonstrated that increased gait arrhythmicity  
392 and decreased peak shank angular velocity of non-freezing gait during the TBC were strong  
393 markers of FOG severity in PD freezers.

394

## 395 **Sixty Hz and 140 Hz subthalamic DBS improved non-freezing gait** 396 **impairment and FOG in freezers during the TBC**

397 Gait impairment and FOG improved during both 60 Hz and 140 Hz subthalamic DBS: the  
398 percent time spent freezing in the TBC was lower during either 60 Hz or 140 Hz DBS compared  
399 to when OFF DBS in freezers ( $5 \pm 7\%$ ,  $9 \pm 10\%$ ,  $35 \pm 23\%$ , respectively,  $p < 0.05$ ) and was not  
400 different from that of non-freezers (whose percent time spent freezing was zero). S1 Video  
401 highlights the decrease in percent time freezing seen during 60 Hz or 140 Hz DBS versus OFF  
402 DBS in a representative patient walking in one ellipse and passing through the narrow  
403 passageway in the TBC. This patient went from 53% task freezing while OFF DBS, to 6% task  
404 freezing on both 60 Hz and 140 Hz DBS.

405 Fig 7 demonstrates that there was a statistically significant effect of DBS frequency  
406 (OFF, 60 Hz, 140 Hz) on shank angular velocity and arrhythmicity ( $p < 0.01$ ,  $p < 0.05$ ), as well

407 as a statistically significant effect of Task (TBC ellipse, TBC figure of eight) on shank angular  
408 velocity ( $p < 0.001$ ) as determined by three-way repeated measures ANOVAs.

409

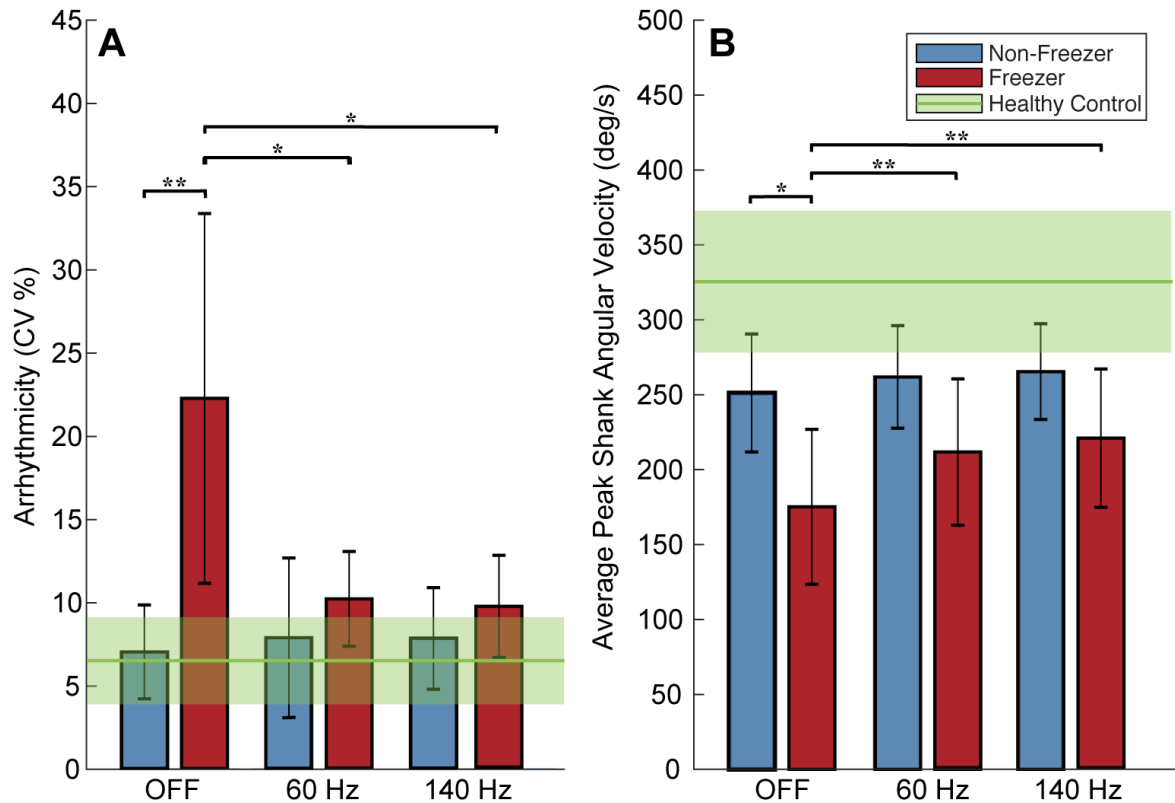

410

411 **Fig 7. Gait arrhythmicity and average peak shank angular velocity OFF and during 60 Hz**

412 **and 140 Hz deep brain stimulation (DBS). A: Gait arrhythmicity and B: average peak shank**

413 **angular velocity during stimulation conditions. Healthy control averages shown (green line) with**

414 **standard deviations (shaded green). Error bars represent standard deviation. \* denotes  $p < 0.05$ ,**

415 **\*\* denotes  $p < 0.01$ .**

416

417 Freezers' gait arrhythmicity during the TBC decreased to values not statistically different from

418 those of non-freezers during both 60 Hz and 140 Hz DBS ( $p > 0.05$ ), Fig 7A, despite freezers'

419 arrhythmicity being significantly higher than that of non-freezers OFF DBS ( $p < 0.01$ ). Freezers'

420 shank angular velocity increased during either frequency of DBS ( $p < 0.01$ ), Fig 7B, despite  
421 being significantly less than that of non-freezers OFF DBS ( $p = 0.036$ ). There was no effect of  
422 DBS on stride time or asymmetry as determined by three-way repeated measures ANOVAs in  
423 freezers and DBS had no detectable effect on any of the non-freezers' gait parameters.

424 OFF DBS freezers had significantly higher arrhythmicity and asymmetry and lower  
425 shank angular velocity, than controls ( $p < 0.05$  for all), but a similar stride time. OFF DBS there  
426 was no difference in non-freezers' arrhythmicity, asymmetry or stride time from those of  
427 controls ( $p > 0.05$  for all); non-freezers' shank angular velocity was significantly lower than that  
428 of controls ( $p = 0.031$ ).

429

## 430 **Discussion**

431 This study has validated the objective measurement of FOG from an instrumented gait task, the  
432 turning and barrier course (TBC), with the international standard FOG questionnaire (FOG-Q).  
433 The TBC mimicked real-life scenarios that trigger FOG in PD and was superior at eliciting more  
434 arrhythmic non-freezing gait, and freezing episodes in freezers compared to 40 meters of forward  
435 walking. Freezers' non-freezing gait was more arrhythmic than that of non-freezers or controls  
436 irrespective of task.

437 A logistic regression model demonstrated that a combination of stride time, swing  
438 angular range, arrhythmicity, and asymmetry of the past six steps best predicted FOG during the  
439 TBC (AUC = 0.754). Freezers' gait arrhythmicity was not only the strongest feature for  
440 predicting FOG, but also the non-freezing gait parameter most highly correlated with freezing  
441 severity (the percent time freezing).

442 Freezers' percent time freezing decreased during either 60 Hz or 140 Hz STN DBS and  
443 their non-freezing gait arrhythmicity and shank angular velocity was restored to similar values as  
444 those of non-freezers.

445

## 446 **The TBC is a validated task for assessing impaired gait and FOG in**

### 447 **PD**

448 It has been difficult to develop an objective measure of FOG since it is challenging to elicit FOG  
449 in the clinic or laboratory where there are few obstacles, tight corners, or narrow door openings  
450 [32]. Tasks that have been shown to provoke FOG include rapid clockwise and counterclockwise  
451 360 degree turns in place [33], in combination with walking through doorways [34], walking  
452 with dual tasking [14,35–37], and forward walking tasks including straight walking or turning  
453 around cones [38]. We previously validated freezing behavior during a stepping in place task on  
454 dual force plates with the FOG-Q3 [23].

455 In designing the TBC, we desired a forward walking task that included standardized  
456 situational triggers for FOG that were representative of real-world scenarios, which could also  
457 measure gait parameters such as stride time, swing time, asymmetry and arrhythmicity during  
458 both non-freezing and freezing behavior, and gait transitions into and out of freezing [25]. This  
459 study validated the TBC with the FOG-Q3, not only with the percent time freezing but also with  
460 parameters of gait impairment such as gait arrhythmicity and shank angular velocity that are not  
461 available in other tasks. Non-freezing gait arrhythmicity was the most valuable parameter in the  
462 validation of the TBC and in differentiating freezers from non-freezers, further supporting the  
463 usefulness of the TBC compared to other tasks that cannot measure stride time variability. The  
464 TBC was superior to FW in eliciting more arrhythmic gait and FOG events in freezers, and in the

465 correlation of gait arrhythmicity with percent time freezing. This result aligns with previous  
466 studies that have shown that freezers exhibit greater arrhythmicity than non-freezers during non-  
467 freezing walking or stepping [24,25,31,39,40], though this is the first study to demonstrate this  
468 during non-freezing walking and turning to the best of our knowledge. This confirms that the  
469 arrhythmicity of non-freezing gait elicited during the TBC is a useful metric to predict the  
470 severity of FOG that freezers may experience in the real world, and is a robust measure of  
471 freezing behavior even during non-freezing gait.

472

### 473 **A logistic regression model identified freezing events using gait** 474 **parameters from the TBC**

475 A logistic regression model identified gait arrhythmicity, swing angular range, stride time, and  
476 asymmetry as the most important gait parameters for classifying freezing events during the TBC.  
477 The model had an AUC of 0.754 and identified the freezing events within the neurologist  
478 identified periods of freezing behavior with 77% accuracy. It was interesting that both the  
479 neurologist and the model behaved as they were ‘trained.’ The model’s definition of a freezing  
480 event was within the neurologist’s period, Fig 5B, as the latter identified gait behavior leading up  
481 to and after an actual freezing episode, which encompassed complete halts in walking often seen  
482 in freezing of gait, but also included gait shuffling, festination, trembling, and shorter strides that  
483 often precede and succeed the complete gait arrest. This highlights another variable in the  
484 definition of FOG, some definitions only include ‘motor blocks’ or events when forward motion  
485 stops, whereas others include abnormal freezing behavior in the definition of FOG.

486 These variable definitions may have contributed to the variation in the accuracy of other  
487 IMU-based FOG detection algorithms, which have reported sensitivities and specificities ranging



488 from 73-99% [13–16,18–20,22,41]. Some of these algorithms detected FOG based on high  
489 frequency components of leg linear acceleration corresponding to leg trembling-FOG, with lower  
490 sensitivity to non-trembling FOG, despite high specificity. The forward freeze index, which  
491 measures the relative component of high to low frequency gait components, has been shown to  
492 be a useful predictor of FOG in a 360-degree turning task [14]; however this had a lower AUC  
493 value in our model compared to other gait parameters, Fig 5A. Explanations for this may include  
494 that the TBC task did not include 360 degree turning, which may specifically induce more leg  
495 trembling high frequency components of freezing behavior. This supports the clinical experience  
496 that FOG manifests with different types of gait impairment depending on what gait task the  
497 person with PD is trying to accomplish.

498

## 499 **FOG and gait impairment in freezers improved during STN DBS**

500 We demonstrated that both FOG and predictors of FOG during non-freezing gait improved  
501 during 60 Hz and 140 Hz STN DBS while subjects walked in the TBC that mimicked real-life  
502 environments that elicit FOG. During the TBC, freezers spent less time freezing when on either  
503 frequency of DBS compared to OFF DBS, which is similar to our reports of the effect of DBS on  
504 the stepping in place and forward walking tasks [24]. Freezers' gait arrhythmicity also improved  
505 on both 60 Hz and 140 Hz DBS, to levels that were not different from that of non-freezers'.  
506 Three out of four of non-freezers' gait parameters OFF DBS were not different from those  
507 exhibited by healthy controls and all were left unchanged on either frequency of DBS. This 'if it  
508 isn't broken, it doesn't need fixing' effect of DBS has been observed in gait [24,42] and in  
509 aspects of postural instability [42–44].

510           Sixty Hz DBS has been shown to be effective in improving axial symptoms in patients  
511 with FOG [10,11], though it is not obvious whether 60 Hz versus 140 Hz is better for FOG in  
512 real-world walking tasks. Using the clinical assessment of FOG from the MDS-UPDRS III,  
513 Ramdhani et al. reported that lower frequency (60 Hz) DBS reduced FOG when high frequency  
514 (130 Hz) DBS did not, even shortly after DBS was initiated [45]. Our previous investigations of  
515 the effect of 60 Hz and 140 Hz DBS on repetitive stepping in place and on progressive  
516 bradykinesia demonstrated that 60 Hz DBS promoted more regularity in ongoing movement,  
517 [24,46]

518           In this study, percent time freezing and gait arrhythmicity improved during either 60 Hz  
519 or 140 Hz STN DBS, and to a similar degree. This aligns with a previous report that gait and  
520 postural performances with low and high frequency stimulations were largely similar [42], and  
521 another demonstrating that 140 Hz STN DBS increased stride length and foot clearing [47],  
522 underscoring the increased shank angular velocities demonstrated during STN DBS in this study.  
523 Altogether this is valuable assurance for people with PD and clinicians that STN DBS can  
524 improve gait and FOG, and that both 60 Hz and 140 Hz improve FOG in real-world walking  
525 tasks.

526

## 527 **Limitations**

528 Our logistic regression model utilized data from only one IMU from a small cohort of freezers.  
529 Although this resulted in interpretable gait features and an accuracy within that of several other  
530 FOG models, it could be improved. Multiple IMUs on different parts of the body may add  
531 sensitivity. The model, being a binary classifier, attempted to capture all of the variability in  
532 freezing behavior with just two labels: “FOG” or “not FOG”. A different model might use

533 multiple classes, where the classifier discriminates between unimpaired walking, a completely  
534 halted gait freeze event, shuffling, and a start hesitation. In addition, only freezers were used to  
535 train and test the logistic regression model, so that the incidence of freezing events was  
536 sufficient. Future models might include bootstrapping methods, evaluate the data from multiple  
537 IMUs, or more data to increase the sizes of the training and test sets.

538

## 539 **Conclusions**

540 Tools and tasks such as the instrumented TBC are necessary for designing and assessing  
541 personalized interventions and therapies for gait impairment and FOG in PD. We have validated  
542 and demonstrated the utility of the instrumented TBC for eliciting FOG, for revealing gait  
543 parameters that identify freezers and predict FOG during non-freezing gait, and for measuring  
544 the efficacy of different frequencies of STN DBS. From the TBC experimental data and a  
545 logistic regression model, we have identified the gait parameters that are most likely to predict  
546 freezing events and which may be useful in closed loop DBS for gait impairment and FOG.

547

## 548 **Acknowledgements**

549 We thank Matthew Petrucci, Tom Prieto, Jordan Parker, Varsha Prabhakar, Raumin Neuville,  
550 Ross Anderson, and Amaris Martinez for their support during the experiments and helpful  
551 comments. We would also like to thank our dedicated patient population who contributed their  
552 time to participating in our study (ClinicalTrials.gov Identifier: NCT02304848).

553

554

## 555 **References**

- 556 1. Giladi N, McMahon D, Przedborski S, Flaster E, Guillory S, Kostic V, et al. Motor blocks  
557 in Parkinson's disease. *Neurology*. 1992 Feb;42(2):333–9.
- 558 2. Morgan D, Funk M, Crossley M, Basran J, Kirk A, Dal Bello-Haas V. The potential of  
559 gait analysis to contribute to differential diagnosis of early stage dementia: current  
560 research and future directions. *Can J Aging*. 2007;
- 561 3. Lippa CF, Duda JE, Grossman M, Hurtig HI, Aarsland D, Boeve BF, et al. DLB and PDD  
562 boundary issues: Diagnosis, treatment, molecular pathology, and biomarkers. *Neurology*.  
563 2007;
- 564 4. Brozova H, Stochl J, Roth J, Ruzicka E. Fear of falling has greater influence than other  
565 aspects of gait disorders on quality of life in patients with Parkinson's disease. *Neuro*  
566 *Endocrinol Lett* [Internet]. 2009;30(4):453–7. Available from:  
567 <http://www.ncbi.nlm.nih.gov/pubmed/20010494>
- 568 5. Bloem BR, Hausdorff JM, Visser JE, Giladi N. Falls and freezing of gait in Parkinson's  
569 disease: A review of two interconnected, episodic phenomena. *Mov Disord* [Internet].  
570 2004 Aug;19(8):871–84. Available from: <http://doi.wiley.com/10.1002/mds.20115>
- 571 6. Amboni M, Stocchi F, Abbruzzese G, Morgante L, Onofri M, Ruggieri S, et al.  
572 Prevalence and associated features of self-reported freezing of gait in Parkinson disease:  
573 The DEEP FOG study. *Park Relat Disord* [Internet]. 2015;21(6):644–9. Available from:  
574 <http://dx.doi.org/10.1016/j.parkreldis.2015.03.028>
- 575 7. Sieber B-AA, Landis S, Koroshetz W, Bateman R, Siderowf A, Galpern WR, et al.  
576 Prioritized research recommendations from the National Institute of Neurological  
577 Disorders and Stroke Parkinson's Disease 2014 Conference. *Ann Neurol* [Internet]. 2014

- 578 Oct;76(4):469–72. Available from: <http://doi.wiley.com/10.1002/ana.24261>
- 579 8. Merola A, Zibetti M, Angrisano S, Rizzi L, Ricchi V, Artusi CA, et al. Parkinson’s  
580 disease progression at 30 years: a study of subthalamic deep brain-stimulated patients.  
581 *Brain* [Internet]. 2011 Jul 1;134(7):2074–84. Available from:  
582 <https://academic.oup.com/brain/article-lookup/doi/10.1093/brain/awr121>
- 583 9. Schlenstedt C, Shalash A, Muthuraman M, Falk D, Witt K, Deuschl G. Effect of high-  
584 frequency subthalamic neurostimulation on gait and freezing of gait in Parkinson’s  
585 disease: a systematic review and meta-analysis. *Eur J Neurol*. 2017;24(1):18–26.
- 586 10. Xie T, Vigil J, MacCracken E, Gasparaitis A, Young J, Kang W, et al. Low-frequency  
587 stimulation of STN-DBS reduces aspiration and freezing of gait in patients with PD.  
588 *Neurology* [Internet]. 2015 Jan 27;84(4):415–20. Available from:  
589 <http://www.neurology.org/cgi/doi/10.1212/WNL.0000000000001184>
- 590 11. Xie T, Padmanaban M, Bloom L, MacCracken E, Bertacchi B, Dachman A, et al. Effect  
591 of low versus high frequency stimulation on freezing of gait and other axial symptoms in  
592 Parkinson patients with bilateral STN DBS: a mini-review. *Transl Neurodegener*  
593 [Internet]. 2017;6:13. Available from:  
594 [http://ovidsp.ovid.com/ovidweb.cgi?T=JS&PAGE=reference&D=pem&NEWS=N&AN=](http://ovidsp.ovid.com/ovidweb.cgi?T=JS&PAGE=reference&D=pem&NEWS=N&AN=28529730)  
595 [28529730](http://ovidsp.ovid.com/ovidweb.cgi?T=JS&PAGE=reference&D=pem&NEWS=N&AN=28529730)
- 596 12. Moreau C, Defebvre L, Destee A, Bleuse S, Clement F, Blatt JL, et al. STN-DBS  
597 frequency effects on freezing of gait in advanced Parkinson disease. *Neurology* [Internet].  
598 2008 Jul 8;71(2):80–4. Available from:  
599 <http://www.neurology.org/cgi/doi/10.1212/01.wnl.0000303972.16279.46>
- 600 13. Moore ST, MacDougall HG, Ondo WG. Ambulatory monitoring of freezing of gait in

- 601 Parkinson's disease. *J Neurosci Methods*. 2008;167(2):340–8.
- 602 14. Mancini M, Priest KC, Nutt JG, Horak FB. Quantifying freezing of gait in Parkinson's  
603 disease during the instrumented timed up and go test. *2012 Annu Int Conf IEEE Eng Med*  
604 *Biol Soc* [Internet]. 2012;1198–201. Available from:  
605 <http://ieeexplore.ieee.org/document/6346151/>
- 606 15. Palmerini L, Rocchi L, Mazilu S, Gazit E, Hausdorff JM, Chiari L. Identification of  
607 characteristic motor patterns preceding freezing of gait in Parkinson's disease using  
608 wearable sensors. *Front Neurol*. 2017;8(AUG):1–12.
- 609 16. Silva de Lima AL, Evers LJW, Hahn T, Bataille L, Hamilton JL, Little MA, et al.  
610 Freezing of gait and fall detection in Parkinson's disease using wearable sensors: a  
611 systematic review. *J Neurol* [Internet]. 2017;264(8):1642–54. Available from:  
612 <http://www.ncbi.nlm.nih.gov/pubmed/28251357>  
613 [http://www.pubmedcentral.nih.gov/a](http://www.pubmedcentral.nih.gov/articlerender.fcgi?artid=PMC5533840)  
[rticlerender.fcgi?artid=PMC5533840](http://www.pubmedcentral.nih.gov/articlerender.fcgi?artid=PMC5533840)
- 614 17. Kwon Y, Park SH, Kim J-W, Ho Y, Jeon H-M, Bang M-J, et al. A practical method for  
615 the detection of freezing of gait in patients with Parkinson's disease. *Clin Interv Aging*  
616 [Internet]. 2014;9:1709–19. Available from:  
617 [http://www.pubmedcentral.nih.gov/articlerender.fcgi?artid=4199977&tool=pmcentrez&re](http://www.pubmedcentral.nih.gov/articlerender.fcgi?artid=4199977&tool=pmcentrez&rendertype=abstract)  
618 [ndertype=abstract](http://www.pubmedcentral.nih.gov/articlerender.fcgi?artid=4199977&tool=pmcentrez&rendertype=abstract)
- 619 18. Rezvanian S, Lockhart T. Towards Real-Time Detection of Freezing of Gait Using  
620 Wavelet Transform on Wireless Accelerometer Data. *Sensors* [Internet]. 2016 Apr  
621 2;16(4):475. Available from: <http://www.mdpi.com/1424-8220/16/4/475>
- 622 19. Coste C, Sijobert B, Pissard-Gibollet R, Pasquier M, Espiau B, Geny C. Detection of  
623 Freezing of Gait in Parkinson Disease: Preliminary Results. *Sensors* [Internet]. 2014 Apr

- 624 15;14(4):6819–27. Available from: <http://www.mdpi.com/1424-8220/14/4/6819/>
- 625 20. Zach H, Janssen AM, Snijders AH, Delval A, Ferraye MU, Auff E, et al. Identifying  
626 freezing of gait in Parkinson’s disease during freezing provoking tasks using waist-  
627 mounted accelerometry. *Parkinsonism Relat Disord*. 2015 Nov;21(11):1362–6.
- 628 21. Khemani P, Dewey RB, BH Q, MP B, A B, RG C, et al. Deep Brain Stimulation of the  
629 Subthalamic Nucleus. *JAMA Neurol* [Internet]. 2015;72(5):499. Available from:  
630 <http://archneur.jamanetwork.com/article.aspx?doi=10.1001/jamaneurol.2015.36>
- 631 22. Kim H, Lee HJ, Lee W, Kwon S, Kim SK, Jeon HS, et al. Unconstrained detection of  
632 freezing of Gait in Parkinson’s disease patients using smartphone. In: 2015 37th Annual  
633 International Conference of the IEEE Engineering in Medicine and Biology Society  
634 (EMBC). 2015. p. 3751–4.
- 635 23. Nantel J, de Solages C, Bronte-Stewart H. Repetitive stepping in place identifies and  
636 measures freezing episodes in subjects with Parkinson’s disease. *Gait Posture* [Internet].  
637 2011;34(3):329–33. Available from: <http://dx.doi.org/10.1016/j.gaitpost.2011.05.020>
- 638 24. Anidi C, O’Day JJ, Anderson RW, Afzal MF, Syrkin-Nikolau J, Velisar A, et al.  
639 Neuromodulation targets pathological not physiological beta bursts during gait in  
640 Parkinson’s disease. *Neurobiol Dis*. 2018;120.
- 641 25. Syrkin-Nikolau J, Koop MM, Prieto T, Anidi C, Afzal MF, Velisar A, et al. Subthalamic  
642 neural entropy is a feature of freezing of gait in freely moving people with Parkinson’s  
643 disease. *Neurobiol Dis* [Internet]. 2017;108(June):288–97. Available from:  
644 <http://dx.doi.org/10.1016/j.nbd.2017.09.002>
- 645 26. Plotnik M, Hausdorff JM. The role of gait rhythmicity and bilateral coordination of  
646 stepping in the pathophysiology of freezing of gait in Parkinson’s disease. *Mov Disord*.

- 647 2008;23(SUPPL. 2):444–50.
- 648 27. Hausdorff JM. Gait dynamics in Parkinson’s disease: common and distinct behavior  
649 among stride length, gait variability, and fractal-like scaling. *Chaos*. 2009  
650 Jun;19(2):26113.
- 651 28. Goetz CG, Tilley BC, Shaftman SR, Stebbins GT, Fahn S, Martinez-Martin P, et al.  
652 Movement Disorder Society-Sponsored Revision of the Unified Parkinson’s Disease  
653 Rating Scale (MDS-UPDRS): Scale presentation and clinimetric testing results. *Mov*  
654 *Disord*. 2008;23(15):2129–70.
- 655 29. Giladi N, Tal J, Azulay T, Rascol O, Brooks DJ, Melamed E, et al. Validation of the  
656 Freezing of Gait Questionnaire in patients with Parkinson’s disease. *Mov Disord*.  
657 2009;24(5):655–61.
- 658 30. Salarian A, Russmann H, Vingerhoets FJG, Dehollain C, Blanc Y, Burkhard PR, et al.  
659 Gait assessment in Parkinson’s disease: Toward an ambulatory system for long-term  
660 monitoring. *IEEE Trans Biomed Eng*. 2004;51(8):1434–43.
- 661 31. Plotnik M, Giladi N, Balash Y, Peretz C, Hausdorff JM. Is freezing of gait in Parkinson’s  
662 disease related to asymmetric motor function? *Ann Neurol*. 2005;57(5):656–63.
- 663 32. Nieuwboer A, Giladi N. The challenge of evaluating freezing of gait in patients with  
664 Parkinson’s disease. *Br J Neurosurg [Internet]*. 2008 Jan 1;22(sup1):S16–8. Available  
665 from: <https://doi.org/10.1080/02688690802448376>
- 666 33. Mancini M, Smulders K, Cohen RG, Horak FB, Giladi N, Nutt JG. The clinical  
667 significance of freezing while turning in Parkinson’s disease. *Neuroscience [Internet]*.  
668 2017;343:222–8. Available from: <http://dx.doi.org/10.1016/j.neuroscience.2016.11.045>
- 669 34. Ziegler K, Schroeteler F, Ceballos-Baumann AO, Fietzek UM. A new rating instrument to



- 670 assess festination and freezing gait in Parkinsonian patients. *Mov Disord*.  
671 2010;25(8):1012–8.
- 672 35. Snijders AH, Haaxma CA, Hagen YJ, Munneke M, Bloem BR. Freezer or non-freezer:  
673 clinical assessment of freezing of gait. *Parkinsonism Relat Disord*. 2012 Feb;18(2):149–  
674 54.
- 675 36. Spildooren J, Vercruyse S, Desloovere K, Wim Vandenberghe MD P, Kerckhofs PhD E,  
676 Nieuwboer A. Freezing of Gait in Parkinson’s Disease: The Impact of Dual-Tasking and  
677 Turning. *Mov Disord*. 2010 Nov 15;25:2563–70.
- 678 37. Rochester L, Nieuwboer A, Baker K, Hetherington V, Willems AM, Kwakkel G, et al.  
679 Walking speed during single and dual tasks in Parkinson’s disease: Which characteristics  
680 are important? *Mov Disord*. 2008;23(16):2312–8.
- 681 38. Mitchell T, Conradsson D, Paquette C. Gait and trunk kinematics during prolonged  
682 turning in Parkinson’s disease with freezing of gait. *Park Relat Disord* [Internet].  
683 2019;(April):0–1. Available from: <https://doi.org/10.1016/j.parkreldis.2019.04.011>
- 684 39. Plotnik M, Hausdorff JM. The role of gait rhythmicity and bilateral coordination of  
685 stepping in the pathophysiology of freezing of gait in Parkinson’s disease. *Mov Disord*.  
686 2008;23 Suppl 2:S444-50.
- 687 40. Hausdorff JM, Schaafsma JD, Balash Y, Bartels AL, Gurevich T, Giladi N. Impaired  
688 regulation of stride variability in Parkinson’s disease subjects with freezing of gait. *Exp*  
689 *Brain Res*. 2003;149(2):187–94.
- 690 41. Moore ST, Yungher DA, Morris TR, Dilda V, MacDougall HG, Shine JM, et al.  
691 Autonomous identification of freezing of gait in Parkinson’s disease from lower-body  
692 segmental accelerometry. *J Neuroeng Rehabil* [Internet]. 2013;10(1):19. Available from:

- 693 <http://jneuroengrehab.biomedcentral.com/articles/10.1186/1743-0003-10-19>
- 694 42. Vallabhajosula S, Haq IU, Hwynn N, Oyama G, Okun M, Tillman MD, et al. Low-  
695 frequency versus high-frequency subthalamic nucleus deep brain stimulation on postural  
696 control and gait in Parkinson's disease: a quantitative study. *Brain Stimul.* 2015;8(1):64–  
697 75.
- 698 43. Bronte-Stewart HM. Postural instability in idiopathic Parkinson's disease: the role of  
699 medication and unilateral pallidotomy. *Brain* [Internet]. 2002;125(9):2100–14. Available  
700 from: <http://brain.oxfordjournals.org/content/125/9/2100.abstract>
- 701 44. Shivitz N, Koop MM, Fahimi J, Heit G, Bronte-Stewart HM. Bilateral subthalamic  
702 nucleus deep brain stimulation improves certain aspects of postural control in Parkinson's  
703 disease, whereas medication does not. *Mov Disord.* 2006;21(8):1088–97.
- 704 45. Ramdhani RA, Patel A, Swope D, Kopell BH. Early Use of 60 Hz Frequency Subthalamic  
705 Stimulation in Parkinson's Disease: A Case Series and Review. *Neuromodulation.*  
706 2015;18(8):664–9.
- 707 46. Blumenfeld Z, Koop MM, Prieto TE, Shreve LA, Velisar A, Quinn EJ, et al. Sixty-hertz  
708 stimulation improves bradykinesia and amplifies subthalamic low-frequency oscillations.  
709 *Mov Disord.* 2017;32(1):80–8.
- 710 47. Hell F, Plate A, Mehrkens JH, Bötzel K. Subthalamic oscillatory activity and connectivity  
711 during gait in Parkinson's disease. *NeuroImage Clin* [Internet]. 2018;19(May):396–405.  
712 Available from: <https://doi.org/10.1016/j.nicl.2018.05.001>
- 713
